# Supplementary material for: Fishing for vaccines against Vibrio cholerae using in silico pan-proteomic reverse vaccinology approach
Source: PeerJ. 2019 Jun 19;7:e6223. doi: 10.7717/peerj.6223 (PMC6589079; doi:10.7717/peerj.6223)
Supplement: Supplemental Information 1 — Each sheet contains step by step prioritizatition of the selected vaccine candidates. [file peerj-07-6223-s001.xlsx]

## Sheet: Export
Genome: Vibrio cholerae O1 biovar eltor str. N16961
Subcellular Localization: Cellwall, Extracellular, OuterMembrane, Periplasmic
Maximum Number of Transmembrane Helices: 1
Minimum Adhesin Probability: 0.51
No Similarity to Human Proteins: checked
#	Protein Accession	Protein GI	Gene Symbol	Locus Tag	Gene ID	Protein Note	Localization	Probability	Adhesin Probability	Trans-membrane helices	Antigenacity
1	NP_229748.1	15640121	VC0089	VC0089	2615828	cytochrome c551 peroxidase	Periplasmic	0.976	0.566	0	0.5075
2	NP_229813.1	15640186	VC0156	VC0156	2612956	vitamin B12 receptor	Outer Membrane	1	0.545	0	0.6571
3	NP_230100.1	15640473	VC0446	VC0446	2615778	organic solvent tolerance protein	Outer Membrane	1	0.574	0	0.6122
4	NP_230129.1	15640502	VC0475	VC0475	2615269	enterobactin receptor protein	Outer Membrane	1	0.540	0	0.6836
5	NP_230184.1	15640555	VC0533	VC0533	2615202	lipoprotein NlpD	Outer Membrane	0.992	0.654	0	0.7878
6	NP_230282.1	15640653	VC0633	VC0633	2615421	outer membrane protein OmpU	Outer Membrane	1	0.563	0	0.74
7	NP_230476.1	15640845	VC0828	VC0828	2614495	toxin co-regulated pilin	Extracellular	1	0.607	1	0.3
8	NP_230492.1	15640861	VC0844	VC0844	2614511	accessory colonization factor AcfA	Outer Membrane	0.952	0.550	0	0.7709
9	NP_230576.1	15640945	VC0929	VC0929	2614149	hypothetical protein VC0929	Extracellular	0.964	0.620	0	0.4824
10	NP_230577.1	15640946	VC0930	VC0930	2614150	hemolysin-related protein	Extracellular	0.844	0.551	0	0.6024
11	NP_230582.1	15640951	VC0935	VC0935	2614155	hypothetical protein VC0935	Outer Membrane	0.949	0.628	0	0.6315
12	NP_230619.1	15640988	VC0972	VC0972	2614225	porin, putative	Outer Membrane	0.952	0.511	0	0.6753
13	NP_230687.1	15641055	VC1042	VC1042	2614312	long-chain fatty acid transport protein	Outer Membrane	0.993	0.692	1	0.5406
14	NP_230688.1	15641056	VC1043	VC1043	2614313	long-chain fatty acid transport protein	Outer Membrane	1	0.682	0	0.5614
15	NP_230720.1	15641088	VC1075	VC1075	2614345	hypothetical protein VC1075	Periplasmic	1	0.653	0	0.5635
16	NP_230852.1	15641220	VC1207	VC1207	2614640	hypothetical protein VC1207	Outer Membrane	0.949	0.522	0	0.5913
17	NP_230962.1	15641330	VC1318	VC1318	2614772	outer membrane protein OmpV	Outer Membrane	1	0.682	0	0.4878
18	NP_230973.1	15641341	VC1329	VC1329	2614783	opacity protein-related protein	Outer Membrane	0.952	0.541	0	0.4856
19	NP_231006.1	15641374	VC1362	VC1362	2614816	amino acid ABC transporter, periplasmic amino acid-binding protein	Periplasmic	0.976	0.581	0	0.5473
20	NP_231058.1	15641426	VC1415	VC1415	2614047	hcp protein	Extracellular	0.971	0.595	0	0.6465
21	NP_231419.1	15641787	VC1784	VC1784	2613664	neuraminidase	Extracellular	1	0.531	0	0.6254
22	NP_231449.1	15641817	VC1815	VC1815	2613695	C factor cell-cell signaling protein	Extracellular	0.971	0.649	0	0.4858
23	NP_231488.1	15641856	VC1854	VC1854	2613608	porin, putative	Outer Membrane	1	0.518	0	0.7463
24	NP_231522.1	15641890	VC1888	VC1888	2613517	hemolysin-related protein	Extracellular	1	0.542	0	0.5126
25	NP_231586.1	15641954	VC1952	VC1952	2613456	chitinase	Extracellular	1	0.672	0	0.5629
26	NP_231773.1	15642141	VC2142	VC2142	2613278	flagellin	Extracellular	1	0.524	0	0.8273
27	NP_231774.1	15642142	VC2143	VC2143	2613279	flagellin	Extracellular	1	0.548	0	0.7362
28	NP_231818.1	15642186	VC2187	VC2187	2613227	flagellin	Extracellular	1	0.567	0	0.7056
29	NP_231825.1	15642193	flgH	VC2194	2613234	flagellar basal body L-ring protein	Outer Membrane	0.992	0.520	0	0.7073
30	NP_231828.1	15642196	flgE	VC2197	2613237	flagellar hook protein FlgE	Extracellular	0.971	0.627	0	0.6287
31	NP_231872.1	15642239	VC2241	VC2241	2613163	cytochrome c554	Periplasmic	1	0.539	0	0.532
32	NP_231936.1	15642303	VC2305	VC2305	2613101	outer membrane protein OmpK	Outer Membrane	1	0.600	0	0.6457
33	NP_232053.1	15642420	VC2423	VC2423	2612965	fimbrial protein	Extracellular	1	0.633	1	0.5221
34	NP_232418.1	15600788	VCA0017	VCA0017	2612496	hcp protein	Extracellular	0.971	0.595	0	0.6465
35	NP_232595.1	15600965	VCA0195	VCA0195	2612373	hypothetical protein VCA0195	Outer Membrane	0.952	0.736	0	0.6485
36	NP_232601.1	15600971	VCA0201	VCA0201	2612359	hypothetical protein VCA0201	Extracellular	0.964	0.605	0	0.4455
37	NP_232617.1	15600987	VCA0218	VCA0218	2612876	thermolabile hemolysin	Extracellular	1	0.597	0	0.4107
38	NP_232626.1	15600996	VCA0227	VCA0227	2612388	iron(III) ABC transporter, periplasmic iron-compound-binding protein	Periplasmic	0.976	0.518	0	0.5024
39	NP_232966.1	15601335	VCA0576	VCA0576	2612698	heme transport protein HutA	Outer Membrane	1	0.553	0	0.6309
40	NP_233014.1	15601383	VCA0625	VCA0625	2612781	TonB receptor-related protein	Outer Membrane	1	0.541	0	0.5823
41	NP_233036.1	15601405	VCA0647	VCA0647	2612266	hypothetical protein VCA0647	Periplasmic	0.984	0.655	0	0.3
42	NP_233197.1	15601566	VCA0811	VCA0811	2611865	N-acetylglucosamine-binding protein A	Extracellular	1	0.514	0	0.7353
43	NP_233235.1	15601604	VCA0849	VCA0849	2612210	hypothetical protein VCA0849	Extracellular	1	0.665	0	0.7263
44	NP_233248.1	15601617	VCA0862	VCA0862	2612849	long-chain fatty acid transport protein	Outer Membrane	1	0.710	0	0.5955
45	NP_233251.1	15601620	VCA0865	VCA0865	2612874	hemagglutinin/protease	Extracellular	1	0.695	1	0.6694
46	NP_233253.1	15601622	VCA0867	VCA0867	2612873	outer membrane protein W	Outer Membrane	1	0.640	0	0.7774
47	NP_233411.1	15601780	VCA1027	VCA1027	2612419	maltose operon periplasmic protein, putative	Periplasmic	0.976	0.562	0	0.4966

## Sheet: prioritized
Genome: Vibrio cholerae O1 biovar eltor str. N16961
Subcellular Localization: Cellwall, Extracellular, OuterMembrane, Periplasmic
Maximum Number of Transmembrane Helices: 1
Minimum Adhesin Probability: 0.51
No Similarity to Human Proteins: checked
#	Protein Accession	Protein GI	Gene Symbol	Locus Tag	Gene ID	Protein Note	Localization	Probability	Adhesin Probability	Trans-membrane helices	Antigenacity
1	NP_229748.1	15640121	VC0089	VC0089	2615828	cytochrome c551 peroxidase	Periplasmic	0.976	0.566	0	0.5075
2	NP_229813.1	15640186	VC0156	VC0156	2612956	vitamin B12 receptor	Outer Membrane	1	0.545	0	0.6571
3	NP_230100.1	15640473	VC0446	VC0446	2615778	organic solvent tolerance protein	Outer Membrane	1	0.574	0	0.6122
4	NP_230129.1	15640502	VC0475	VC0475	2615269	enterobactin receptor protein	Outer Membrane	1	0.540	0	0.6836
5	NP_230184.1	15640555	VC0533	VC0533	2615202	lipoprotein NlpD	Outer Membrane	0.992	0.654	0	0.7878
6	NP_230282.1	15640653	VC0633	VC0633	2615421	outer membrane protein OmpU	Outer Membrane	1	0.563	0	0.74
7	NP_230476.1	15640845	VC0828	VC0828	2614495	toxin co-regulated pilin	Extracellular	1	0.607	1	0.3
8	NP_230492.1	15640861	VC0844	VC0844	2614511	accessory colonization factor AcfA	Outer Membrane	0.952	0.550	0	0.7709
9	NP_230576.1	15640945	VC0929	VC0929	2614149	hypothetical protein VC0929	Extracellular	0.964	0.620	0	0.4824
10	NP_230577.1	15640946	VC0930	VC0930	2614150	hemolysin-related protein	Extracellular	0.844	0.551	0	0.6024
11	NP_230582.1	15640951	VC0935	VC0935	2614155	hypothetical protein VC0935	Outer Membrane	0.949	0.628	0	0.6315
12	NP_230619.1	15640988	VC0972	VC0972	2614225	porin, putative	Outer Membrane	0.952	0.511	0	0.6753
13	NP_230687.1	15641055	VC1042	VC1042	2614312	long-chain fatty acid transport protein	Outer Membrane	0.993	0.692	1	0.5406
14	NP_230688.1	15641056	VC1043	VC1043	2614313	long-chain fatty acid transport protein	Outer Membrane	1	0.682	0	0.5614
15	NP_230720.1	15641088	VC1075	VC1075	2614345	hypothetical protein VC1075	Periplasmic	1	0.653	0	0.5635
16	NP_230852.1	15641220	VC1207	VC1207	2614640	hypothetical protein VC1207	Outer Membrane	0.949	0.522	0	0.5913
17	NP_230962.1	15641330	VC1318	VC1318	2614772	outer membrane protein OmpV	Outer Membrane	1	0.682	0	0.4878
18	NP_230973.1	15641341	VC1329	VC1329	2614783	opacity protein-related protein	Outer Membrane	0.952	0.541	0	0.4856
19	NP_231006.1	15641374	VC1362	VC1362	2614816	amino acid ABC transporter, periplasmic amino acid-binding protein	Periplasmic	0.976	0.581	0	0.5473
20	NP_231058.1	15641426	VC1415	VC1415	2614047	hcp protein	Extracellular	0.971	0.595	0	0.6465
21	NP_231419.1	15641787	VC1784	VC1784	2613664	neuraminidase	Extracellular	1	0.531	0	0.6254
22	NP_231449.1	15641817	VC1815	VC1815	2613695	C factor cell-cell signaling protein	Extracellular	0.971	0.649	0	0.4858
23	NP_231488.1	15641856	VC1854	VC1854	2613608	porin, putative	Outer Membrane	1	0.518	0	0.7463
24	NP_231522.1	15641890	VC1888	VC1888	2613517	hemolysin-related protein	Extracellular	1	0.542	0	0.5126
25	NP_231586.1	15641954	VC1952	VC1952	2613456	chitinase	Extracellular	1	0.672	0	0.5629
26	NP_231773.1	15642141	VC2142	VC2142	2613278	flagellin	Extracellular	1	0.524	0	0.8273
27	NP_231774.1	15642142	VC2143	VC2143	2613279	flagellin	Extracellular	1	0.548	0	0.7362
28	NP_231818.1	15642186	VC2187	VC2187	2613227	flagellin	Extracellular	1	0.567	0	0.7056
29	NP_231825.1	15642193	flgH	VC2194	2613234	flagellar basal body L-ring protein	Outer Membrane	0.992	0.520	0	0.7073
30	NP_231828.1	15642196	flgE	VC2197	2613237	flagellar hook protein FlgE	Extracellular	0.971	0.627	0	0.6287
31	NP_231872.1	15642239	VC2241	VC2241	2613163	cytochrome c554	Periplasmic	1	0.539	0	0.532
32	NP_231936.1	15642303	VC2305	VC2305	2613101	outer membrane protein OmpK	Outer Membrane	1	0.600	0	0.6457
33	NP_232053.1	15642420	VC2423	VC2423	2612965	fimbrial protein	Extracellular	1	0.633	1	0.5221
34	NP_232418.1	15600788	VCA0017	VCA0017	2612496	hcp protein	Extracellular	0.971	0.595	0	0.6465
35	NP_232595.1	15600965	VCA0195	VCA0195	2612373	hypothetical protein VCA0195	Outer Membrane	0.952	0.736	0	0.6485
36	NP_232601.1	15600971	VCA0201	VCA0201	2612359	hypothetical protein VCA0201	Extracellular	0.964	0.605	0	0.4455
37	NP_232617.1	15600987	VCA0218	VCA0218	2612876	thermolabile hemolysin	Extracellular	1	0.597	0	0.4107
38	NP_232626.1	15600996	VCA0227	VCA0227	2612388	iron(III) ABC transporter, periplasmic iron-compound-binding protein	Periplasmic	0.976	0.518	0	0.5024
39	NP_232966.1	15601335	VCA0576	VCA0576	2612698	heme transport protein HutA	Outer Membrane	1	0.553	0	0.6309
40	NP_233014.1	15601383	VCA0625	VCA0625	2612781	TonB receptor-related protein	Outer Membrane	1	0.541	0	0.5823
41	NP_233036.1	15601405	VCA0647	VCA0647	2612266	hypothetical protein VCA0647	Periplasmic	0.984	0.655	0	0.3
42	NP_233197.1	15601566	VCA0811	VCA0811	2611865	N-acetylglucosamine-binding protein A	Extracellular	1	0.514	0	0.7353
43	NP_233235.1	15601604	VCA0849	VCA0849	2612210	hypothetical protein VCA0849	Extracellular	1	0.665	0	0.7263
44	NP_233248.1	15601617	VCA0862	VCA0862	2612849	long-chain fatty acid transport protein	Outer Membrane	1	0.710	0	0.5955
45	NP_233251.1	15601620	VCA0865	VCA0865	2612874	hemagglutinin/protease	Extracellular	1	0.695	1	0.6694
46	NP_233253.1	15601622	VCA0867	VCA0867	2612873	outer membrane protein W	Outer Membrane	1	0.640	0	0.7774
47	NP_233411.1	15601780	VCA1027	VCA1027	2612419	maltose operon periplasmic protein, putative	Periplasmic	0.976	0.562	0	0.4966

## Sheet: epitopes
		>NP_230184.1						NP_230282.1								NP_230492.1							NP_231488.1						NP_231773.1								NP_233253.1
		MHC I Binding						MHC I Binding Prediction						MHC I Binding Prediction Order by allele name							MHC I Binding Prediction Order by allele name							MHC I Binding Prediction Order by allele name							MHC I Binding Prediction Order by allele name
Index	Epitope	Epitope Length	MHC Allele	P value	Matching from	Matching to	Index	Epitope	Epitope Length	MHC Allele	P value	Matching from	Matching to	Index	Epitope	Epitope Length	MHC Allele	P value	Matching from	Matching to	Index	Epitope	Epitope Length	MHC Allele	P value	Matching from	Matching to	Index	Epitope	Epitope Length	MHC Allele	P value	Matching from	Matching to	Index	Epitope	Epitope Length	MHC Allele	P value	Matching from	Matching to	Location
1	AYAHNDQLL	9	HLA-A*24:02	0.000655	259	267	1	ITDFTDIMSY	10	HLA-A*01:01	4.61e-05	141	150	1	YSSYKLEDQY	10	HLA-A*01:01	0.000112	73	82	1	KLYAGYEYV	9	HLA-A*02:01	0.000308	289	297	1	VSAMTAQRY	9	HLA-A*01:01	0.00133	9	17	1	YYFGEANSTF	10	HLA-A*24:02	7.41e-05	113	122
2	ATADGTVVY	9	HLA-A*01:01	0.00124	228	236	2	GYSLSAIYTF	10	HLA-A*24:02	0.000139	214	223	2	VLSISLNSKY	10	HLA-A*01:01	0.00118	204	213	2	YGDGTTLGY	9	HLA-A*01:01	0.000331	332	340	2	KLQLFASSQK	10	HLA-A*03:01	0.00159	241	250	2	YMLNDSWFL	9	HLA-A*02:01	0.000107	168	176
3	LLFCSLLFGC	10	HLA-A*02:01	0.00142	11	20	3	YSDNGEDGY	9	HLA-A*01:01	0.000171	207	215	3	TTLSANAAPY	10	HLA-A*01:01	0.00238	12	21	3	RTRNSHIKK	9	HLA-A*03:01	0.000616	11	19	3	KLLNGSFGSK	10	HLA-A*03:01	0.00196	136	145	3	DYMLNDSWFL	10	HLA-A*24:02	0.000176	167	176
4	ISYNDLAPPY	10	HLA-A*01:01	0.00191	71	80	4	YADQDDQNEY	10	HLA-A*01:01	0.000631	234	243	4	VYSYPIHQQL	10	HLA-A*24:02	0.00246	116	125	4	TSDDVYGADY	10	HLA-A*01:01	0.000833	133	142	4	LQRMRDLAL	9	HLA-B*07:02	0.00269	89	97	4	FTDNISFEV	9	HLA-A*01:01	0.000358	68	76
5	TVDQTKTKEY	10	HLA-A*01:01	0.00191	159	168	5	YYFKPNFRSY	10	HLA-A*24:02	0.000903	311	320	5	GYKFNDNFSF	10	HLA-A*24:02	0.0028	60	69	5	TLVYLGVEYK	10	HLA-A*03:01	0.00129	310	319	5	SMRSDTQAM	9	HLA-B*07:02	0.00394	163	171	5	NYTTFFDESF	10	HLA-A*24:02	0.00127	131	140
6	LYSFRLGLLL	10	HLA-A*24:02	0.00524	3	12	6	SYISYQFNL	9	HLA-A*24:02	0.00145	319	327	6	ALFSLGLDY	9	HLA-A*03:01	0.00303	174	182	6	KYVYEADSFW	10	HLA-A*24:02	0.00186	166	175	6	AATDLTLSY	9	HLA-A*01:01	0.00403	190	198	6	LAANVGFDY	9	HLA-A*01:01	0.00133	160	168
7	LLFGCTAPT	9	HLA-A*02:01	0.00597	16	24	7	YTGYELAAGY	10	HLA-A*01:01	0.00163	271	280	7	LSVGTELRY	9	HLA-A*01:01	0.00339	188	196	7	VYLGVEYKF	9	HLA-A*24:02	0.00199	312	320	7	AVMLSMGSMR	10	HLA-A*03:01	0.00528	156	165	7	DYMLNDSWF	9	HLA-A*24:02	0.00145	167	175
8	STNSQNLTK	9	HLA-A*03:01	0.00608	145	153	8	NSLDNRYTY	9	HLA-A*01:01	0.00184	111	119	8	SFEINYSSYK	10	HLA-A*03:01	0.00346	68	77	8	VYGADYSYF	9	HLA-A*24:02	0.00214	137	145	8	LLNGSFGSK	9	HLA-A*03:01	0.0057	137	145	8	GYMFTDNISF	10	HLA-A*24:02	0.00173	65	74
9	LYSFRLGLL	9	HLA-A*24:02	0.00634	3	11	9	RVDNMLAYK	9	HLA-A*03:01	0.00261	164	172	9	TANHSFETNY	10	HLA-A*01:01	0.00358	30	39	9	YVYEADSFWV	10	HLA-A*02:01	0.00225	167	176	9	SMERLSSGYK	10	HLA-A*03:01	0.00667	28	37	9	NTQLGLTLGY	10	HLA-A*01:01	0.00294	57	66
10	TVSKSSNTK	9	HLA-A*03:01	0.00649	131	139	10	ASNNSLDNRY	10	HLA-A*01:01	0.00294	108	117	10	APYIGLELGI	10	HLA-B*07:02	0.00406	19	28	10	ILGVKTNFGK	10	HLA-A*03:01	0.00262	115	124	10	NVSAMTAQRY	10	HLA-A*01:01	0.00759	8	17	10	FTDNISFEV	9	HLA-A*02:01	0.00326	68	76
11	WLPNYTPPA	9	HLA-A*02:01	0.00687	91	99	11	KAEINDSLY	9	HLA-A*01:01	0.00301	82	90	11	ALLETGLKK	9	HLA-A*03:01	0.00434	161	169	11	KSDAGTVDFY	10	HLA-A*01:01	0.00274	48	57	11	SMERLSSGY	9	HLA-A*01:01	0.0081	28	36	11	VFMIAGGYKF	10	HLA-A*24:02	0.00401	208	217
12	KIAKWLWPTK	10	HLA-A*03:01	0.00719	190	199	12	RVRLNFLGK	9	HLA-A*03:01	0.00326	74	82	12	LFSLGLDYNL	10	HLA-A*24:02	0.00448	175	184	12	LYVGATFGDL	10	HLA-A*24:02	0.00317	194	203	12	VMLSMGSMR	9	HLA-A*03:01	0.00884	157	165	12	VLAATPFSHK	10	HLA-A*03:01	0.00412	76	85
13	DYNKVERGSY	10	HLA-A*24:02	0.00766	34	43	13	FGDLGVKASY	10	HLA-A*01:01	0.00407	175	184	13	KYNDVLSISL	10	HLA-A*24:02	0.00524	200	209	13	YTIGDALIGV	10	HLA-A*02:01	0.00343	246	255	13	ILDGALKAV	9	HLA-A*02:01	0.00963	292	300	13	WVFMIAGGY	9	HLA-A*01:01	0.00658	207	215
14	HNEHYLSAY	9	HLA-A*01:01	0.00897	252	260	14	KLGLNKMNK	9	HLA-A*03:01	0.00434	4	12	14	LSISLNSKY	9	HLA-A*01:01	0.00531	205	213	14	FYGQLRTEL	9	HLA-A*24:02	0.00393	56	64	14	GAATDLTLSY	10	HLA-A*01:01	0.0107	189	198	14	PPTFMVQYYF	10	HLA-B*07:02	0.00757	106	115
15	YYEVKKGDTL	10	HLA-A*24:02	0.0095	47	56	15	YTFGDTGFNV	10	HLA-A*02:01	0.00479	221	230	15	IPELSVGTEL	10	HLA-B*07:02	0.00596	185	194	15	ADEDGTLVY	9	HLA-A*01:01	0.00426	305	313	15	DYARETTAM	9	HLA-A*24:02	0.0118	339	347	15	FIVRAGIASV	10	HLA-A*02:01	0.00783	27	36
16	KGDTLYFIAY	10	HLA-A*01:01	0.00974	52	61	16	GYELAAGYKL	10	HLA-A*24:02	0.00498	273	282	16	FLGGLIGYK	9	HLA-A*03:01	0.00649	54	62	16	VYGADYSYFF	10	HLA-A*24:02	0.00448	137	146	16	DWRVGAATDL	10	HLA-A*24:02	0.0122	185	194	16	WVFMIAGGYK	10	HLA-A*03:01	0.0083	207	216
17	STNSQNLTKK	10	HLA-A*03:01	0.0102	145	154	17	AASYRMENLY	10	HLA-A*01:01	0.00517	246	255	17	ALISVYSYPI	10	HLA-A*02:01	0.00654	112	121	17	NPLVIDEDAI	10	HLA-B*07:02	0.00456	267	276	17	SILDGALKAV	10	HLA-A*02:01	0.0122	291	300	17	IVRAGIASV	9	HLA-B*07:02	0.00885	28	36
18	KIAKWLWPT	9	HLA-A*02:01	0.0103	190	198	18	FAIDATYYFK	10	HLA-A*03:01	0.00528	305	314	18	KALLETGLKK	10	HLA-A*03:01	0.00667	160	169	18	KYVYEADSF	9	HLA-A*24:02	0.00532	166	174	18	ILQQASTSV	9	HLA-A*02:01	0.0132	352	360	18	YANIETTATY	10	HLA-A*01:01	0.00928	182	191
19	TMGSSGTNSV	10	HLA-A*02:01	0.0104	282	291	19	AYKGQFGDL	9	HLA-A*24:02	0.00532	170	178	19	YQFDKYNDV	9	HLA-A*02:01	0.00687	196	204	19	ALKDSGDMYV	10	HLA-A*02:01	0.00544	102	111	19	NLDNVNENV	9	HLA-A*02:01	0.014	320	328	19	FMVQYYFGEA	10	HLA-A*02:01	0.00984	109	118
20	APTPAPVSGL	10	HLA-B*07:02	0.0111	22	31	20	SYRMENLYF	9	HLA-A*24:02	0.00532	248	256	20	MFLGGLIGYK	10	HLA-A*03:01	0.00719	53	62	20	KVADKTKLY	9	HLA-A*01:01	0.00624	283	291	20	ALNDELNRI	9	HLA-A*02:01	0.0149	118	126	20	PTFMVQYYF	9	HLA-A*01:01	0.0104	107	115
21	VVYSGNALR	9	HLA-A*03:01	0.0124	234	242	21	ASYRMENLY	9	HLA-A*01:01	0.00592	247	255	21	VTHTQYEAY	9	HLA-A*01:01	0.00769	133	141	21	TYKVADKTKL	10	HLA-A*24:02	0.00637	281	290	21	KSMERLSSGY	10	HLA-A*01:01	0.0153	27	36	21	GLAANVGFDY	10	HLA-A*01:01	0.0107	159	168
22	LIIIKHNEHY	10	HLA-A*03:01	0.0131	247	256	22	YMLAASYRM	9	HLA-A*02:01	0.00641	243	251	22	SLNNQQYRK	9	HLA-A*03:01	0.00784	90	98	22	KLYAGYEYVM	10	HLA-A*02:01	0.00654	289	298	22	AMNETTNIL	9	HLA-A*24:02	0.0156	81	89	22	VPNDSSDKVL	10	HLA-B*07:02	0.0115	37	46
23	YSFRLGLLL	9	HLA-A*01:01	0.014	4	12	23	KPNFRSYISY	10	HLA-B*07:02	0.00658	314	323	23	AYSGKYEEL	9	HLA-A*24:02	0.00841	140	148	23	GTLVYLGVEY	10	HLA-A*01:01	0.00684	309	318	23	QLFASSQKV	9	HLA-A*02:01	0.0158	243	251	23	RPYVGAGLNY	10	HLA-B*07:02	0.0115	123	132
24	RGSYRGSYY	9	HLA-A*03:01	0.0146	40	48	24	AIDATYYFK	9	HLA-A*03:01	0.00692	306	314	24	FLFTTLSANA	10	HLA-A*02:01	0.00879	9	18	24	FALKDSGDMY	10	HLA-A*01:01	0.00684	101	110	24	TTAMTKAQIL	10	HLA-B*07:02	0.0166	344	353	24	MLNDSWFLNA	10	HLA-A*02:01	0.0116	169	178
25	SVRLHFEIRY	10	HLA-A*01:01	0.0146	290	299	25	KMNKTLIAL	9	HLA-A*02:01	0.00737	9	17	25	GLDYNLIPEL	10	HLA-A*02:01	0.0093	179	188	25	SDDVYGADY	9	HLA-A*01:01	0.00694	134	142	25	AMNETTNIL	9	HLA-A*02:01	0.0167	81	89	25	HLPPTFMVQY	10	HLA-A*01:01	0.0128	104	113
26	LTDKDVNDL	9	HLA-A*01:01	0.0154	62	70	26	IYTFGDTGF	9	HLA-A*24:02	0.00752	220	228	26	YSYPIHQQL	9	HLA-A*24:02	0.00941	117	125	26	EYGYGDGTTL	10	HLA-A*24:02	0.007	329	338	26	KSYRAQEGK	9	HLA-A*03:01	0.017	174	182	26	GTNAGLSDLK	10	HLA-A*03:01	0.0131	144	153
27	VYSGNALRGY	10	HLA-A*24:02	0.0154	235	244	27	TYAGIGGTY	9	HLA-A*24:02	0.00752	118	126	27	GIESLNNQQY	10	HLA-A*01:01	0.00974	87	96	27	SSRAGVDANY	10	HLA-A*01:01	0.00721	78	87	27	SMERLSSGY	9	HLA-A*03:01	0.017	28	36	27	WYANIETTA	9	HLA-A*24:02	0.0139	181	189
28	PSDEKIAKW	9	HLA-A*01:01	0.0169	186	194	28	GQAAFTATY	9	HLA-A*01:01	0.0081	283	291	28	LLLNDDIEI	9	HLA-A*02:01	0.0103	150	158	28	NSYFEVTGEY	10	HLA-A*01:01	0.00721	237	246	28	RYLNGAADGM	10	HLA-A*24:02	0.0174	16	25	28	SVVPNDSSDK	10	HLA-A*03:01	0.0139	35	44
29	IAKWLWPTK	9	HLA-A*03:01	0.017	191	199	29	ASYRMENLY	9	HLA-A*03:01	0.00995	247	255	29	ALFSLGLDY	9	HLA-A*01:01	0.0115	174	182	29	AISVAGTYK	9	HLA-A*03:01	0.00737	275	283	29	SQRASLGAF	9	HLA-B*07:02	0.0175	302	310	29	GSLGDIGETK	10	HLA-A*03:01	0.0139	94	103
30	KIKLWLPNY	9	HLA-A*03:01	0.017	87	95	30	VVTETNAAKY	10	HLA-A*01:01	0.0107	198	207	30	ELSVGTELRY	10	HLA-A*01:01	0.0117	187	196	30	FLEDKDPTI	9	HLA-A*02:01	0.00737	66	74	30	FQNRFGHAI	9	HLA-A*02:01	0.0177	310	318	30	FTDNISFEVL	10	HLA-A*01:01	0.0146	68	77
31	SYNDLAPPY	9	HLA-A*24:02	0.0175	72	80	31	GTYGEVTYGK	10	HLA-A*03:01	0.0109	124	133	31	HTQYEAYSGK	10	HLA-A*03:01	0.0123	135	144	31	RYGTLSDAL	9	HLA-A*24:02	0.00752	152	160	31	AFQNRFGHAI	10	HLA-A*24:02	0.0181	309	318	31	FTDNISFEVL	10	HLA-A*02:01	0.0159	68	77
32	CTAPTPAPV	9	HLA-A*01:01	0.0177	20	28	32	TYGKNDGAL	9	HLA-A*24:02	0.0111	130	138	32	GVTHTQYEAY	10	HLA-A*01:01	0.0134	132	141	32	DALHDSQVKY	10	HLA-A*01:01	0.00799	158	167	32	AVSILDGALK	10	HLA-A*03:01	0.0193	289	298	32	EINPWVFMI	9	HLA-A*24:02	0.0165	203	211
33	GDTLYFIAY	9	HLA-A*01:01	0.0177	53	61	33	NDSLYGVGFY	10	HLA-A*01:01	0.0112	86	95	33	KLEDQYSKFI	10	HLA-A*02:01	0.0143	77	86	33	ASWARVYAEY	10	HLA-A*01:01	0.00884	321	330	33	SPSAALSLL	9	HLA-B*07:02	0.0194	367	375	33	SWGLAANVGF	10	HLA-A*24:02	0.0167	157	166
34	IIIKHNEHY	9	HLA-A*03:01	0.0179	248	256	34	RMENLYFAGL	10	HLA-A*02:01	0.0116	250	259	34	TLSANAAPY	9	HLA-A*01:01	0.0154	13	21	34	DSFWVKAGY	9	HLA-A*01:01	0.00897	172	180	34	SRSRIRDTDY	10	HLA-A*01:01	0.0195	331	340	34	TPFSHKIST	9	HLA-B*07:02	0.0167	80	88
35	LIIIKHNEHY	10	HLA-A*01:01	0.018	247	256	35	SAAAVATGAY	10	HLA-A*01:01	0.0117	20	29	35	KVGVTHTQY	9	HLA-A*03:01	0.0154	130	138	35	YFEVTGEYTI	10	HLA-A*24:02	0.00991	239	248	35	RFGHAISNL	9	HLA-A*24:02	0.0196	313	321	35	KLDDSWGLAA	10	HLA-A*02:01	0.0167	153	162
36	TPPAYGGTGG	10	HLA-B*07:02	0.018	96	105	36	EYMLAASYRM	10	HLA-A*24:02	0.0117	242	251	36	YSYPIHQQLK	10	HLA-A*03:01	0.0156	117	126	36	QWINMKKTLL	10	HLA-A*24:02	0.00991	21	30	36	YINGQTEDV	9	HLA-A*02:01	0.0198	224	232	36	LAATPFSHK	9	HLA-A*03:01	0.017	77	85
37	PYTIHPGQKI	10	HLA-A*24:02	0.0181	79	88	37	AAAVATGAY	9	HLA-A*01:01	0.0121	21	29	37	NYQSDAVSL	9	HLA-A*24:02	0.0156	38	46	37	LVYLGVEYK	9	HLA-A*03:01	0.00995	311	319	37	KLLNGSFGS	9	HLA-A*02:01	0.021	136	144	37	FTDNISFEVL	10	HLA-B*07:02	0.018	68	77
38	QTVSKSSNTK	10	HLA-A*03:01	0.0183	130	139	38	ATYNNAETAK	10	HLA-A*03:01	0.0131	289	298	38	VLSISLNSKY	10	HLA-A*03:01	0.0156	204	213	38	YVRNHILGV	9	HLA-A*02:01	0.0109	110	118	38	TQAMGGKSY	9	HLA-A*01:01	0.0213	168	176	38	ATYKAGADAK	10	HLA-A*03:01	0.0183	189	198
39	YLTDKDVNDL	10	HLA-A*02:01	0.0184	61	70	39	ITDFTDIMS	9	HLA-A*01:01	0.0133	141	149	39	SISLNSKYY	9	HLA-A*03:01	0.0162	206	214	39	RTELKFLEDK	10	HLA-A*03:01	0.0116	61	70	39	LQLFASSQK	9	HLA-A*03:01	0.0216	242	250	39	LAALSSAPV	9	HLA-B*07:02	0.0184	11	19
40	VATADGTVVY	10	HLA-A*01:01	0.0188	227	236	40	YISYQFNLL	9	HLA-A*02:01	0.014	320	328	40	LISVYSYPI	9	HLA-A*02:01	0.0167	113	121	40	DFYGQLRTEL	10	HLA-A*24:02	0.0122	55	64	40	GDDLEELATY	10	HLA-A*01:01	0.022	215	224	40	YMFTDNISF	9	HLA-B*07:02	0.0184	66	74
41	QLLAKEGQTV	10	HLA-A*02:01	0.0193	265	274	41	ITDFTDIMSY	10	HLA-A*03:01	0.0147	141	150	41	TLSANAAPY	9	HLA-A*03:01	0.017	13	21	41	NYTVNDSLAL	10	HLA-A*24:02	0.0122	86	95	41	DTQAMGGKSY	10	HLA-A*01:01	0.022	167	176	41	YFGEANSTF	9	HLA-A*24:02	0.0196	114	122
42	IAGQRGQAV	9	HLA-B*07:02	0.0194	218	226	42	LGQAAFTATY	10	HLA-A*01:01	0.0159	282	291	42	KQLALISVY	9	HLA-A*03:01	0.0197	109	117	42	IGDALIGVTY	10	HLA-A*01:01	0.0123	248	257	42	TTSFGGNKLL	10	HLA-B*07:02	0.0221	129	138	42	WVFMIAGGY	9	HLA-A*03:01	0.0197	207	215
43	GTNSVRLHF	9	HLA-A*01:01	0.0194	287	295	43	VADRVDNML	9	HLA-A*01:01	0.0169	161	169	43	YQFDKYNDVL	10	HLA-A*02:01	0.0203	196	205	43	FPEDNAKQEL	10	HLA-B*07:02	0.0125	182	191	43	YLNGAADGM	9	HLA-A*02:01	0.0222	17	25	43	KHLPPTFMV	9	HLA-A*02:01	0.021	103	111
44	MTLYSFRLGL	10	HLA-B*07:02	0.0195	1	10	44	AKDVDYTGY	9	HLA-A*01:01	0.0169	266	274	44	LALISVYSY	9	HLA-A*01:01	0.0204	111	119	44	KTKLYAGYEY	10	HLA-A*01:01	0.0128	287	296	44	TTAMTKAQIL	10	HLA-A*01:01	0.0229	344	353	44	LSSAPVFAH	9	HLA-A*01:01	0.0213	14	22
45	WLPNYTPPAY	10	HLA-A*01:01	0.0195	91	100	45	YQFNLLDSDK	10	HLA-A*03:01	0.0174	323	332	45	QLALISVYSY	10	HLA-A*01:01	0.0211	110	119	45	ALKDSGDMY	9	HLA-A*01:01	0.0133	102	110	45	VADVNVSTV	9	HLA-A*01:01	0.0234	275	283	45	GLAANVGFDY	10	HLA-A*03:01	0.0223	159	168
46	LLAKEGQTV	9	HLA-A*02:01	0.0198	266	274	46	TGFNVGAGY	9	HLA-A*01:01	0.0177	226	234	46	ALISVYSYPI	10	HLA-B*07:02	0.0212	112	121	46	QWINMKKTL	9	HLA-A*24:02	0.0139	21	29	46	SAMTAQRYL	9	HLA-B*07:02	0.0237	10	18	46	FMIAGGYKF	9	HLA-A*02:01	0.0234	209	217
47	KQNVNVNVAK	10	HLA-A*03:01	0.0203	174	183	47	LLDSDKVGKV	10	HLA-A*02:01	0.0184	327	336	47	SSYKLEDQY	9	HLA-A*01:01	0.0213	74	82	47	IKADVTNSY	9	HLA-A*01:01	0.014	231	239	47	SFGSKSFQI	9	HLA-A*24:02	0.0277	141	149	47	TQLGLTLGY	9	HLA-A*01:01	0.0234	58	66
48	SYRGSYYEV	9	HLA-A*24:02	0.0208	42	50	48	VYSAKGTSL	9	HLA-A*24:02	0.0185	44	52	48	NMEDMFLGGL	10	HLA-A*02:01	0.0223	49	58	48	ALHDSQVKY	9	HLA-A*03:01	0.0146	159	167	48	QTEDVKASV	9	HLA-A*01:01	0.028	228	236	48	ALSSAPVFA	9	HLA-A*02:01	0.0247	13	21
49	TLYFIAYLT	9	HLA-A*02:01	0.021	55	63	49	GYKLGQAAF	9	HLA-A*24:02	0.0185	279	287	49	PYIGLELGI	9	HLA-A*24:02	0.0233	20	28	49	HDSQVKYVY	9	HLA-A*01:01	0.0161	161	169	49	NRLTSQSRGL	10	HLA-B*07:02	0.0299	52	61	49	IVRAGIASV	9	HLA-A*02:01	0.0247	28	36
50	TTATVAQTV	9	HLA-A*01:01	0.0223	124	132	50	SGDKAGSTVY	10	HLA-A*01:01	0.0195	36	45	50	GTELRYQFDK	10	HLA-A*03:01	0.0234	191	200	50	LVYLGVEYKF	10	HLA-A*24:02	0.0167	311	320	50	YARETTAMTK	10	HLA-A*03:01	0.0303	340	349	50	YTTFFDESF	9	HLA-A*01:01	0.0256	132	140
51	LLLFCSLLF	9	HLA-A*03:01	0.0226	10	18	51	RSYISYQFNL	10	HLA-A*01:01	0.0211	318	327	51	KTLSAIFLF	9	HLA-A*24:02	0.0247	3	11	51	YTVNDSLAL	9	HLA-A*01:01	0.0169	87	95	51	KQGDDLEEL	9	HLA-A*02:01	0.0319	213	221	51	SWFLNASVWY	10	HLA-A*03:01	0.0256	173	182
52	WLWPTKGRVI	10	HLA-A*02:01	0.0233	194	203	52	SLDNRYTYA	9	HLA-A*02:01	0.0222	112	120	52	FEINYSSYK	9	HLA-A*03:01	0.0247	69	77	52	GTYKVADKTK	10	HLA-A*03:01	0.0183	280	289	52	MAINVNTNV	9	HLA-A*02:01	0.0319	1	9	52	LSDLKLDDSW	10	HLA-A*01:01	0.0257	149	158
53	YTIHPGQKIK	10	HLA-A*03:01	0.0234	80	89	53	KLGQAAFTA	9	HLA-A*02:01	0.0222	281	289	53	YPIHQQLKT	9	HLA-B*07:02	0.0261	119	127	53	GDALIGVTY	9	HLA-A*01:01	0.0186	249	257	53	NLDNVNENV	9	HLA-A*01:01	0.032	320	328	53	HLPPTFMVQY	10	HLA-A*03:01	0.0267	104	113
54	TVVYSGNAL	9	HLA-B*07:02	0.0237	233	241	54	SLYGVGFYE	9	HLA-A*03:01	0.0236	88	96	54	ISLNSKYYF	9	HLA-A*24:02	0.0262	207	215	54	KSDAGTVDF	9	HLA-A*01:01	0.0186	48	56	54	GAFQNRFGH	9	HLA-A*03:01	0.0331	308	316	54	NIETTATYK	9	HLA-A*03:01	0.0269	184	192
55	RGSYRGSYY	9	HLA-A*01:01	0.0245	40	48	55	FAIDATYYF	9	HLA-A*01:01	0.0245	305	313	55	IESLNNQQY	9	HLA-A*01:01	0.0268	88	96	55	NAKQELAELY	10	HLA-A*01:01	0.0188	186	195	55	LQQASTSVL	9	HLA-B*07:02	0.0333	353	361	55	LNDSWFLNA	9	HLA-A*01:01	0.028	170	178
56	KTVDQTKTK	9	HLA-A*03:01	0.0247	158	166	56	ADQDDQNEY	9	HLA-A*01:01	0.0245	235	243	56	QKTLSAIFLF	10	HLA-A*24:02	0.0281	2	11	56	FFGGTGLRY	9	HLA-A*01:01	0.0194	145	153	56	YARETTAMT	9	HLA-B*07:02	0.0349	340	348	56	VVPNDSSDK	9	HLA-A*03:01	0.0281	36	44
57	AYAHNDQLLA	10	HLA-A*24:02	0.0249	259	268	57	IGGTYGEVTY	10	HLA-A*01:01	0.0247	122	131	57	TLSAIFLFT	9	HLA-A*02:01	0.0288	4	12	57	ADSFWVKAGY	10	HLA-A*01:01	0.0195	171	180	57	YINGQTEDVK	10	HLA-A*03:01	0.0353	224	233	57	KLDDSWGLA	9	HLA-A*02:01	0.0288	153	161
58	YSFRLGLLLF	10	HLA-A*01:01	0.0257	4	13	58	DNFAIDATYY	10	HLA-A*01:01	0.0247	303	312	58	NPNMEDMFL	9	HLA-B*07:02	0.0288	47	55	58	NFGIGARIYW	10	HLA-A*24:02	0.0203	359	368	58	VGEDGKLQLF	10	HLA-A*01:01	0.0363	236	245	58	SLGDIGETK	9	HLA-A*03:01	0.0293	95	103
59	SVRLHFEIRY	10	HLA-A*03:01	0.0279	290	299	59	YRFADRNAV	9	HLA-B*07:02	0.0249	184	192	59	IRKALLETGL	10	HLA-B*07:02	0.0313	158	167	59	YVRNHILGV	9	HLA-B*07:02	0.0204	110	118	59	ALKAVDSQR	9	HLA-A*03:01	0.0372	296	304	59	YMLNDSWFL	9	HLA-A*03:01	0.0305	168	176
60	VDQTKTKEY	9	HLA-A*01:01	0.028	160	168	60	LYFAGLFTDG	10	HLA-A*24:02	0.0249	254	263	60	KTLSAIFLF	9	HLA-A*03:01	0.0318	3	11	60	YTVNDSLAL	9	HLA-B*07:02	0.0204	87	95	60	SALNDELNRI	10	HLA-A*02:01	0.0376	117	126	60	VFAHQEGDFI	10	HLA-A*24:02	0.0332	19	28
61	KTKEYVEPV	9	HLA-A*02:01	0.0303	164	172	61	RAEARLSLK	9	HLA-A*03:01	0.0258	57	65	61	ELLLNDDIEI	10	HLA-A*02:01	0.0318	149	158	61	LYAGYEYVM	9	HLA-A*24:02	0.0208	290	298	61	GQTEDVKASV	10	HLA-A*02:01	0.0376	227	236	61	YMFTDNISF	9	HLA-A*03:01	0.0344	66	74
62	ALRGYGNLII	10	HLA-B*07:02	0.0327	240	249	62	EINDSLYGV	9	HLA-A*02:01	0.026	84	92	62	FNDNFSFEI	9	HLA-A*01:01	0.0335	63	71	62	LVIDEDAISV	10	HLA-A*02:01	0.0212	269	278	62	AVSILDGAL	9	HLA-B*07:02	0.0383	289	297	62	VLAALSSAPV	10	HLA-A*02:01	0.0346	10	19
63	EPVGKQNVNV	10	HLA-B*07:02	0.0327	170	179	63	TGFNVGAGY	9	HLA-A*03:01	0.0269	226	234	63	FSLGLDYNL	9	HLA-A*02:01	0.0335	176	184	63	VIDEDAISV	9	HLA-A*02:01	0.0234	270	278	63	TTSFGGNKLL	10	HLA-A*01:01	0.0392	129	138	63	GEANSTFRPY	10	HLA-A*01:01	0.035	116	125
64	ALRGYGNLI	9	HLA-A*02:01	0.0335	240	248	64	GRAEARLSL	9	HLA-B*07:02	0.0274	56	64	64	DMFLGGLIGY	10	HLA-A*01:01	0.0336	52	61	64	SVNAAEILK	9	HLA-A*03:01	0.0236	40	48	64	ETTNILQRM	9	HLA-A*01:01	0.0417	84	92	64	APVFAHQEGD	10	HLA-B*07:02	0.0357	17	26
65	WLPNYTPPAY	10	HLA-A*03:01	0.034	91	100	65	ELAIGLRYDF	10	HLA-A*24:02	0.0281	341	350	65	NMEDMFLGGL	10	HLA-A*24:02	0.0346	49	58	65	TVGTTTTDIK	10	HLA-A*03:01	0.0245	223	232	65	ISNRLTSQSR	10	HLA-A*03:01	0.042	50	59	65	LAVNSNTQL	9	HLA-B*07:02	0.0366	52	60
66	YQGKSVNPK	9	HLA-A*03:01	0.0344	299	307	66	GLFTDGELAK	10	HLA-A*03:01	0.0291	258	267	66	ESLNNQQYRK	10	HLA-A*03:01	0.0353	89	98	66	TIGDALIGV	9	HLA-A*02:01	0.0247	247	255	66	NSARDDAAGL	10	HLA-A*01:01	0.0424	39	48	66	VPNDSSDKV	9	HLA-B*07:02	0.0383	37	45
67	VSGLGKDYNK	10	HLA-A*03:01	0.0353	28	37	67	SLYGVGFYEG	10	HLA-A*02:01	0.0292	88	97	67	KNRFGALFSL	10	HLA-B*07:02	0.0357	169	178	67	DMYVRNHIL	9	HLA-A*24:02	0.0247	108	116	67	SQSRGLDMAV	10	HLA-A*02:01	0.0424	56	65	67	YVGAGLNYT	9	HLA-A*02:01	0.0387	125	133
68	IIIKHNEHYL	10	HLA-A*24:02	0.0361	248	257	68	NKMNKTLIAL	10	HLA-B*07:02	0.0299	8	17	68	SVGTELRYQF	10	HLA-A*24:02	0.0361	189	198	68	KLYAGYEYVM	10	HLA-B*07:02	0.0252	289	298	68	ILQRMRDLAL	10	HLA-A*01:01	0.0441	88	97	68	KVLNTQSEL	9	HLA-A*02:01	0.0387	44	52
69	LSAYAHNDQL	10	HLA-A*01:01	0.0363	257	266	69	ADRVDNMLAY	10	HLA-A*01:01	0.03	162	171	69	SAIFLFTTL	9	HLA-B*07:02	0.0366	6	14	69	KSDAGTVDFY	10	HLA-A*03:01	0.0256	48	57	69	STSVLAQAK	9	HLA-A*03:01	0.0447	357	365	69	EANSTFRPY	9	HLA-A*01:01	0.0399	117	125
70	LYFIAYLTDK	10	HLA-A*03:01	0.0366	56	65	70	KAGSTVYSAK	10	HLA-A*03:01	0.0315	39	48	70	YSKFIGIESL	10	HLA-B*07:02	0.0374	82	91	70	EYTIGDALI	9	HLA-A*24:02	0.0262	245	253	70	TYINGQTEDV	10	HLA-A*24:02	0.0447	223	232	70	TPFSHKISTS	10	HLA-B*07:02	0.0427	80	89
71	KPSDEKIAKW	10	HLA-B*07:02	0.0374	185	194	71	IMSYHGNTA	9	HLA-A*02:01	0.0319	147	155	71	SYKLEDQYSK	10	HLA-A*24:02	0.0377	75	84	71	NFGKFSFGK	9	HLA-A*03:01	0.0269	121	129	71	GADSGEAVML	10	HLA-A*01:01	0.0459	150	159	71	ANIETTATY	9	HLA-A*01:01	0.0435	183	191
72	NSVRLHFEI	9	HLA-A*24:02	0.0389	289	297	72	SLDNRYTYA	9	HLA-A*03:01	0.0331	112	120	72	LKKNRFGAL	9	HLA-B*07:02	0.0402	167	175	72	YFFGGTGLRY	10	HLA-A*03:01	0.0279	144	153	72	GLGGEIGFDA	10	HLA-A*02:01	0.0459	260	269	72	ALSSAPVFAH	10	HLA-A*01:01	0.0459	13	22
73	ALRGYGNLII	10	HLA-A*02:01	0.0391	240	249	73	YMLAASYRM	9	HLA-B*07:02	0.0333	243	251	73	GALFSLGLDY	10	HLA-A*03:01	0.0407	173	182	73	ALKDSGDMY	9	HLA-A*03:01	0.0281	102	110	73	KLLNGSFGSK	10	HLA-A*02:01	0.0459	136	145	73	YVGAGLNYTT	10	HLA-A*02:01	0.0459	125	134
74	STNSQNLTK	9	HLA-A*01:01	0.0399	145	153	74	MSYHGNTAA	9	HLA-B*07:02	0.0349	148	156	74	SLGLDYNLI	9	HLA-A*24:02	0.0411	177	185	74	ATFGDLAVH	9	HLA-A*03:01	0.0281	198	206	74	SARDDAAGL	9	HLA-B*07:02	0.0461	40	48	74	LPPTFMVQY	9	HLA-B*07:02	0.0461	105	113
75	LPNYTPPAY	9	HLA-B*07:02	0.0402	92	100	75	EDGYSLSAIY	10	HLA-A*01:01	0.035	212	221	75	TTLSANAAPY	10	HLA-A*03:01	0.042	12	21	75	KKRQWINMKK	10	HLA-A*03:01	0.0291	18	27	75	MERLSSGYKI	10	HLA-B*07:02	0.0467	29	38	75	FMIAGGYKF	9	HLA-B*07:02	0.0461	209	217
76	ASSTSASVAK	10	HLA-A*03:01	0.0407	112	121	76	KASYRFADR	9	HLA-A*03:01	0.0358	181	189	76	TANHSFETNY	10	HLA-A*03:01	0.0448	30	39	76	SWARVYAEY	9	HLA-A*24:02	0.031	322	330	76	RSRIRDTDY	9	HLA-A*01:01	0.0474	332	340	76	NTQLGLTLGY	10	HLA-A*03:01	0.0463	57	66
77	QGKSVNPKRY	10	HLA-A*01:01	0.0408	300	309	77	NVVTETNAAK	10	HLA-A*03:01	0.0366	197	206	77	GTANHSFET	9	HLA-A*01:01	0.0495	29	37	77	KVDSANNFGI	10	HLA-A*02:01	0.0318	353	362	77	TQAMGGKSYR	10	HLA-A*03:01	0.0477	168	177	77	KHLPPTFMV	9	HLA-A*24:02	0.0484	103	111
78	TVVYSGNALR	10	HLA-A*03:01	0.042	233	242	78	FADRNAVDA	9	HLA-A*01:01	0.0382	186	194	5 unique MHC I alleles.							78	TLLALAVLAA	10	HLA-A*02:01	0.0318	28	37	78	TDLTLSYTNK	10	HLA-A*03:01	0.0492	192	201	78	MKQTICGLAV	10	HLA-B*07:02	0.0488	1	10
79	HPGQKIKLW	9	HLA-B*07:02	0.0421	83	91	79	KMNKTLIALA	10	HLA-A*02:01	0.0391	9	18	Run MHC I epitope prediction using IEDB consensus method and compare with Vaxitope							79	TLLALAVLA	9	HLA-A*02:01	0.0319	28	36	79	LQLFASSQKV	10	HLA-A*02:01	0.0495	242	251	79	LAANVGFDYM	10	HLA-B*07:02	0.0488	160	169
80	YFIAYLTDK	9	HLA-A*03:01	0.0431	57	65	80	KPNFRSYIS	9	HLA-B*07:02	0.0402	314	322								80	KQWTTSDDV	9	HLA-A*02:01	0.0319	129	137	5 unique MHC I alleles.							80	STSGGELGSL	10	HLA-A*02:01	0.0495	87	96
81	PSDEKIAKWL	10	HLA-A*01:01	0.0441	186	195	81	FAIDATYYF	9	HLA-B*07:02	0.0402	305	313	MHC II Binding Order by allele name							81	KFLEDKDPTI	10	HLA-A*24:02	0.0332	65	74	Run MHC I epitope prediction using IEDB consensus method and compare with Vaxitope							5 unique MHC I alleles.
82	HPGQKIKLWL	10	HLA-B*07:02	0.0446	83	92	82	AASYRMENLY	10	HLA-A*03:01	0.0407	246	255	Index	Epitope	Epitope Length	MHC Allele	P value	Matching from	Matching to	82	YSYFFGGTGL	10	HLA-B*07:02	0.0342	142	151								Run MHC I epitope prediction using IEDB consensus method and compare with Vaxitope
83	YAHNDQLLAK	10	HLA-A*03:01	0.0448	260	269	83	FAIDATYYF	9	HLA-A*02:01	0.0445	305	313	1	SAIFLFTTL	9	HLA-DRB1*11:01	0.000925	6	14	83	YSYFFGGTGL	10	HLA-A*02:01	0.0346	142	151	MHC II Binding Order by allele name
84	WPTKGRVIKN	10	HLA-B*07:02	0.0467	196	205	84	GQAAFTATY	9	HLA-A*03:01	0.0447	283	291	2	ELELLLNDD	9	HLA-DRB1*03:01	0.00367	147	155	84	ALQGKVEFA	9	HLA-A*02:01	0.0406	94	102	Index	Epitope	Epitope Length	MHC Allele	P value	Matching from	Matching to	MHC II Binding Order by allele name
85	GLLLFCSLLF	10	HLA-A*03:01	0.0477	9	18	85	KMNKTLIAL	9	HLA-A*24:02	0.0459	9	17	3	IFLFTTLSA	9	HLA-DRB1*07:01	0.00424	8	16	85	MYVRNHILGV	10	HLA-A*24:02	0.041	109	118	1	KLQLFASSQ	9	HLA-DRB1*07:01	0.004	241	249	Index	Epitope	Epitope Length	MHC Allele	P value	Matching from	Matching to	Location
							86	AGSTVYSAK	9	HLA-A*03:01	0.0463	40	48	4	LSAIFLFTT	9	HLA-DRB1*01:01	0.00574	5	13	86	DAISVAGTY	9	HLA-A*01:01	0.0417	274	282	2	EAVMLSMGS	9	HLA-DRB1*03:01	0.00749	155	163	1	TFMVQYYFG	9	HLA-DRB1*15:01	0.000718	108	116
Index	Epitope	Epitope Length	MHC Allele	P value	Matching from	Matching to	87	SYRFADRNAV	10	HLA-A*24:02	0.0467	183	192	5	KNRFGALFS	9	HLA-DRB1*15:01	0.00879	169	177	87	YGADYSYFF	9	HLA-A*02:01	0.0425	138	146	3	GKLQLFASS	9	HLA-DRB1*11:01	0.017	240	248	2	PFSHKISTS	9	HLA-DRB1*07:01	0.004	81	89
1	KGRVIKNFS	9	HLA-DRB1*03:01	4.53e-05	199	207	88	PNFRSYISY	9	HLA-A*01:01	0.0474	315	323	6	FSFEINYSS	9	HLA-DRB1*07:01	0.0101	67	75	88	LYVGATFGD	9	HLA-A*24:02	0.0434	194	202	4	EAVMLSMGS	9	HLA-DRB1*15:01	0.0172	155	163	3	DSWFLNASV	9	HLA-DRB1*01:01	0.00539	172	180
2	KGRVIKNFS	9	HLA-DRB1*15:01	0.00026	199	207	89	NKLGLNKMNK	10	HLA-A*03:01	0.0477	3	12	7	LSAIFLFTT	9	HLA-DRB1*15:01	0.018	5	13	89	SWARVYAEY	9	HLA-A*01:01	0.0435	322	330	5	AREVTINAK	9	HLA-DRB1*03:01	0.018	205	213	4	INPWVFMIA	9	HLA-DRB1*15:01	0.00643	204	212
3	GLLLFCSLL	9	HLA-DRB1*01:01	0.00106	9	17	90	NLYFAGLFT	9	HLA-A*02:01	0.0487	253	261	8	NFSFEINYS	9	HLA-DRB1*01:01	0.0188	66	74	90	SQVKYVYEA	9	HLA-A*02:01	0.0445	163	171	6	KINSARDDA	9	HLA-DRB1*03:01	0.0214	37	45	5	GFDYMLNDS	9	HLA-DRB1*03:01	0.00749	165	173
4	GNLIIIKHN	9	HLA-DRB1*11:01	0.00116	245	253	91	ITDFTDIMSY	10	HLA-B*07:02	0.0488	141	150	9	NFSFEINYS	9	HLA-DRB1*03:01	0.0191	66	74	91	YGYGDGTTL	9	HLA-A*02:01	0.0445	330	338	7	KAQILQQAS	9	HLA-DRB1*03:01	0.0226	349	357	6	SWFLNASVW	9	HLA-DRB1*07:01	0.00867	173	181
5	DTLYFIAYL	9	HLA-DRB1*11:01	0.00237	54	62	92	RLNFLGKAEI	10	HLA-B*07:02	0.0488	76	85	10	KNRFGALFS	9	HLA-DRB1*07:01	0.0192	169	177	92	DPTIGSGSSR	10	HLA-B*07:02	0.0446	71	80	8	SSGYKINSA	9	HLA-DRB1*01:01	0.0252	33	41	7	LSDLKLDDS	9	HLA-DRB1*03:01	0.0118	149	157
6	KHNEHYLSA	9	HLA-DRB1*07:01	0.00298	251	259	93	EDELAIGLRY	10	HLA-A*01:01	0.0496	339	348	11	GGLIGYKFN	9	HLA-DRB1*15:01	0.0197	56	64	93	GTTLGYTNK	9	HLA-A*03:01	0.0447	335	343	9	EAVSILDGA	9	HLA-DRB1*03:01	0.0253	288	296	8	NPWVFMIAG	9	HLA-DRB1*01:01	0.0123	205	213
7	GQKIKLWLP	9	HLA-DRB1*11:01	0.00377	85	93	94	VTETNAAKY	9	HLA-A*03:01	0.0497	199	207	12	MEDMFLGGL	9	HLA-DRB1*01:01	0.0198	50	58	94	GSDAEVKATK	10	HLA-A*03:01	0.0448	344	353	10	KAQILQQAS	9	HLA-DRB1*15:01	0.0278	349	357	9	NPWVFMIAG	9	HLA-DRB1*03:01	0.0126	205	213
8	TLYFIAYLT	9	HLA-DRB1*01:01	0.00445	55	63	95	LLDSDKVGK	9	HLA-A*03:01	0.0497	327	335	13	QLALISVYS	9	HLA-DRB1*15:01	0.0206	110	118	95	ATFGDLAVH	9	HLA-A*01:01	0.0455	198	206	11	RFGHAISNL	9	HLA-DRB1*15:01	0.0278	313	321	10	LGYMFTDNI	9	HLA-DRB1*03:01	0.0134	64	72
9	GNLIIIKHN	9	HLA-DRB1*15:01	0.00491	245	253	5 unique MHC I alleles.							14	KYNDVLSIS	9	HLA-DRB1*07:01	0.021	200	208	96	GYGDGTTLGY	10	HLA-A*01:01	0.0459	331	340	12	AINVNTNVS	9	HLA-DRB1*03:01	0.0281	2	10	11	NVGFDYMLN	9	HLA-DRB1*11:01	0.0161	163	171
10	RLGLLLFCS	9	HLA-DRB1*15:01	0.00879	7	15	Run MHC I epitope prediction using IEDB consensus method and compare with Vaxitope							15	NFSFEINYS	9	HLA-DRB1*15:01	0.0215	66	74	97	NMKKTLLAL	9	HLA-B*07:02	0.0461	24	32	13	SSGYKINSA	9	HLA-DRB1*07:01	0.0287	33	41	12	DSWFLNASV	9	HLA-DRB1*11:01	0.0241	172	180
11	TLYFIAYLT	9	HLA-DRB1*07:01	0.00914	55	63								16	GGLIGYKFN	9	HLA-DRB1*11:01	0.0241	56	64	98	NSYFEVTGEY	10	HLA-A*03:01	0.0463	237	246	14	MLSMGSMRS	9	HLA-DRB1*01:01	0.0291	158	166	13	WFLNASVWY	9	HLA-DRB1*15:01	0.0278	174	182
12	GLLLFCSLL	9	HLA-DRB1*11:01	0.0099	9	17	MHC II Binding Order by allele name							17	NPNMEDMFL	9	HLA-DRB1*03:01	0.0267	47	55	99	TSDDVYGADY	10	HLA-A*03:01	0.0463	133	142	15	SRGLDMAVK	9	HLA-DRB1*03:01	0.0297	58	66	14	LGYMFTDNI	9	HLA-DRB1*01:01	0.0304	64	72
13	GLLLFCSLL	9	HLA-DRB1*07:01	0.0101	9	17	Index	Epitope	Epitope Length	MHC Allele	P value	Matching from	Matching to	18	FGALFSLGL	9	HLA-DRB1*01:01	0.0277	172	180	100	AGSVNAAEIL	10	HLA-A*01:01	0.0477	38	47	16	RFGHAISNL	9	HLA-DRB1*07:01	0.034	313	321	15	NVGFDYMLN	9	HLA-DRB1*15:01	0.0315	163	171
14	DTLYFIAYL	9	HLA-DRB1*15:01	0.0102	54	62	1	NSRVRLNFL	9	HLA-DRB1*15:01	0.00204	72	80	19	NRFGALFSL	9	HLA-DRB1*11:01	0.0305	170	178	101	DSFWVKAGY	9	HLA-A*03:01	0.048	172	180	17	KSFQIGADS	9	HLA-DRB1*03:01	0.0347	145	153	16	PWVFMIAGG	9	HLA-DRB1*07:01	0.0355	206	214
15	NSVRLHFEI	9	HLA-DRB1*15:01	0.0118	289	297	2	RSYISYQFN	9	HLA-DRB1*15:01	0.00392	318	326	20	SKFIGIESL	9	HLA-DRB1*07:01	0.034	83	91	102	GQNRDKAFK	9	HLA-A*03:01	0.048	210	218	18	KLLNGSFGS	9	HLA-DRB1*07:01	0.0385	136	144	17	GLAVLAALS	9	HLA-DRB1*01:01	0.0364	7	15
16	GNLIIIKHN	9	HLA-DRB1*03:01	0.0126	245	253	3	YISYQFNLL	9	HLA-DRB1*01:01	0.00574	320	328	21	IFLFTTLSA	9	HLA-DRB1*03:01	0.0423	8	16	103	YFFGGTGLRY	10	HLA-A*01:01	0.0496	144	153	19	KLQLFASSQ	9	HLA-DRB1*01:01	0.0398	241	249	18	GLAVLAALS	9	HLA-DRB1*15:01	0.0384	7	15
17	GQKIKLWLP	9	HLA-DRB1*01:01	0.013	85	93	4	SYQFNLLDS	9	HLA-DRB1*03:01	0.007	322	330	22	VLSISLNSK	9	HLA-DRB1*03:01	0.0423	204	212	104	TVDFYGQLR	9	HLA-A*03:01	0.0497	53	61	20	EDGKLQLFA	9	HLA-DRB1*15:01	0.0414	238	246	19	QYYFGEANS	9	HLA-DRB1*07:01	0.0453	112	120
18	KQNVNVNVA	9	HLA-DRB1*03:01	0.0134	174	182	5	KLGLNKMNK	9	HLA-DRB1*03:01	0.00801	4	12	23	PIHQQLKTN	9	HLA-DRB1*11:01	0.0454	120	128	5 unique MHC I alleles.							21	NTNVSAMTA	9	HLA-DRB1*01:01	0.0491	6	14	20	PFSHKISTS	9	HLA-DRB1*15:01	0.0482	81	89
19	KGRVIKNFS	9	HLA-DRB1*07:01	0.0137	199	207	6	KPNFRSYIS	9	HLA-DRB1*07:01	0.00867	314	322	24	SKFIGIESL	9	HLA-DRB1*01:01	0.0471	83	91	Run MHC I epitope prediction using IEDB consensus method and compare with Vaxitope							5 unique MHC II alleles.							21	NYTTFFDES	9	HLA-DRB1*03:01	0.0489	131	139
20	KLWLPNYTP	9	HLA-DRB1*07:01	0.0183	89	97	7	NLYFAGLFT	9	HLA-DRB1*01:01	0.013	253	261	25	FDKYNDVLS	9	HLA-DRB1*01:01	0.0471	198	206								Run MHC II epitope prediction using IEDB consensus method and compare with Vaxitope							5 unique MHC II alleles.
21	NEHYLSAYA	9	HLA-DRB1*01:01	0.0229	253	261	8	YRMENLYFA	9	HLA-DRB1*15:01	0.0137	249	257	5 unique MHC II alleles.							MHC II Binding Order by allele name														Run MHC II epitope prediction using IEDB consensus method and compare with Vaxitope
22	GRVIKNFSA	9	HLA-DRB1*11:01	0.0253	200	208	9	NKTLIALAV	9	HLA-DRB1*01:01	0.0169	11	19	Run MHC II epitope prediction using IEDB consensus method and compare with Vaxitope							Index	Epitope	Epitope Length	MHC Allele	P value	Matching from	Matching to
23	KQNVNVNVA	9	HLA-DRB1*07:01	0.0275	174	182	10	YYFKPNFRS	9	HLA-DRB1*11:01	0.017	311	319								1	QWINMKKTL	9	HLA-DRB1*11:01	0.00192	21	29
24	HYLSAYAHN	9	HLA-DRB1*11:01	0.0291	255	263	11	KTLIALAVS	9	HLA-DRB1*15:01	0.0206	12	20								2	QWINMKKTL	9	HLA-DRB1*07:01	0.00233	21	29
25	LYFIAYLTD	9	HLA-DRB1*03:01	0.0297	56	64	12	KTLIALAVS	9	HLA-DRB1*11:01	0.0208	12	20								3	KKRQWINMK	9	HLA-DRB1*03:01	0.0025	18	26
26	SVRLHFEIR	9	HLA-DRB1*03:01	0.0365	290	298	13	NEYMLAASY	9	HLA-DRB1*01:01	0.0208	241	249								4	WINMKKTLL	9	HLA-DRB1*01:01	0.00649	22	30
27	PGQKIKLWL	9	HLA-DRB1*15:01	0.0369	84	92	14	KTLIALAVS	9	HLA-DRB1*07:01	0.023	12	20								5	KVEFALKDS	9	HLA-DRB1*03:01	0.00654	98	106
28	KGRVIKNFS	9	HLA-DRB1*01:01	0.0398	199	207	15	NEYMLAASY	9	HLA-DRB1*07:01	0.0275	241	249								6	EYKFASWAR	9	HLA-DRB1*11:01	0.00936	317	325
29	EKIAKWLWP	9	HLA-DRB1*15:01	0.043	189	197	16	NSRVRLNFL	9	HLA-DRB1*01:01	0.0304	72	80								7	NPLVIDEDA	9	HLA-DRB1*03:01	0.0134	267	275
							17	RVDNMLAYK	9	HLA-DRB1*11:01	0.0305	164	172								8	VEYKFASWA	9	HLA-DRB1*07:01	0.0137	316	324
							18	FTDIMSYHG	9	HLA-DRB1*11:01	0.0319	144	152								9	YLGVEYKFA	9	HLA-DRB1*15:01	0.0137	313	321
							19	KLGQAAFTA	9	HLA-DRB1*07:01	0.0326	281	289								10	KFSFGKQWT	9	HLA-DRB1*07:01	0.0159	124	132
							20	NLYFAGLFT	9	HLA-DRB1*07:01	0.0326	253	261								11	LIGVTYYNA	9	HLA-DRB1*15:01	0.0165	252	260
							21	LGVITDFTD	9	HLA-DRB1*03:01	0.0329	138	146								12	AAEILKSDA	9	HLA-DRB1*03:01	0.0214	43	51
							22	NSRVRLNFL	9	HLA-DRB1*11:01	0.0382	72	80								13	VRNHILGVK	9	HLA-DRB1*03:01	0.0226	111	119
							23	YISYQFNLL	9	HLA-DRB1*11:01	0.0399	320	328								14	GDMYVRNHI	9	HLA-DRB1*11:01	0.0229	107	115
							24	ADNFAIDAT	9	HLA-DRB1*03:01	0.0403	302	310								15	ILGVKTNFG	9	HLA-DRB1*15:01	0.029	115	123
							25	NLYFAGLFT	9	HLA-DRB1*11:01	0.0417	253	261								16	KRQWINMKK	9	HLA-DRB1*15:01	0.0315	19	27
							26	ARLSLKDGK	9	HLA-DRB1*03:01	0.0444	60	68								17	GADYSYFFG	9	HLA-DRB1*15:01	0.0384	139	147
							27	KLGQAAFTA	9	HLA-DRB1*11:01	0.0454	281	289								18	KFSFGKQWT	9	HLA-DRB1*01:01	0.0452	124	132
							28	MGNVVTETN	9	HLA-DRB1*03:01	0.0489	195	203								19	GDMYVRNHI	9	HLA-DRB1*01:01	0.0452	107	115
							29	ASYRFADRN	9	HLA-DRB1*11:01	0.0494	182	190								5 unique MHC II alleles.
							5 unique MHC II alleles.														Run MHC II epitope prediction using IEDB consensus method and compare with Vaxitope
							Run MHC II epitope prediction using IEDB consensus method and compare with Vaxitope

## Sheet: top12x6 epitopes
		>NP_230184.1						NP_230282.1								NP_230492.1							NP_231488.1						NP_231773.1								NP_233253.1
		MHC I Binding						MHC I Binding Prediction						MHC I Binding Prediction Order by allele name							MHC I Binding Prediction Order by allele name							MHC I Binding Prediction Order by allele name							MHC I Binding Prediction Order by allele name
Index	Epitope	Epitope Length	MHC Allele	P value	Matching from	Matching to	Index	Epitope	Epitope Length	MHC Allele	P value	Matching from	Matching to	Index	Epitope	Epitope Length	MHC Allele	P value	Matching from	Matching to	Index	Epitope	Epitope Length	MHC Allele	P value	Matching from	Matching to	Index	Epitope	Epitope Length	MHC Allele	P value	Matching from	Matching to	Index	Epitope	Epitope Length	MHC Allele	P value	Matching from	Matching to	Location
1	AYAHNDQLL	9	HLA-A*24:02	0.000655	259	267	1	ITDFTDIMSY	10	HLA-A*01:01	4.61e-05	141	150	1	YSSYKLEDQY	10	HLA-A*01:01	0.000112	73	82	1	KLYAGYEYV	9	HLA-A*02:01	0.000308	289	297	1	VSAMTAQRY	9	HLA-A*01:01	0.00133	9	17	1	YYFGEANSTF	10	HLA-A*24:02	7.41e-05	113	122
2	ATADGTVVY	9	HLA-A*01:01	0.00124	228	236	2	GYSLSAIYTF	10	HLA-A*24:02	0.000139	214	223	2	VLSISLNSKY	10	HLA-A*01:01	0.00118	204	213	2	YGDGTTLGY	9	HLA-A*01:01	0.000331	332	340	2	KLQLFASSQK	10	HLA-A*03:01	0.00159	241	250	2	YMLNDSWFL	9	HLA-A*02:01	0.000107	168	176
3	LLFCSLLFGC	10	HLA-A*02:01	0.00142	11	20	3	YSDNGEDGY	9	HLA-A*01:01	0.000171	207	215	3	TTLSANAAPY	10	HLA-A*01:01	0.00238	12	21	3	RTRNSHIKK	9	HLA-A*03:01	0.000616	11	19	3	KLLNGSFGSK	10	HLA-A*03:01	0.00196	136	145	3	DYMLNDSWFL	10	HLA-A*24:02	0.000176	167	176
4	ISYNDLAPPY	10	HLA-A*01:01	0.00191	71	80	4	YADQDDQNEY	10	HLA-A*01:01	0.000631	234	243	4	VYSYPIHQQL	10	HLA-A*24:02	0.00246	116	125	4	TSDDVYGADY	10	HLA-A*01:01	0.000833	133	142	4	LQRMRDLAL	9	HLA-B*07:02	0.00269	89	97	4	FTDNISFEV	9	HLA-A*01:01	0.000358	68	76
5	TVDQTKTKEY	10	HLA-A*01:01	0.00191	159	168	5	YYFKPNFRSY	10	HLA-A*24:02	0.000903	311	320	5	GYKFNDNFSF	10	HLA-A*24:02	0.0028	60	69	5	TLVYLGVEYK	10	HLA-A*03:01	0.00129	310	319	5	SMRSDTQAM	9	HLA-B*07:02	0.00394	163	171	5	NYTTFFDESF	10	HLA-A*24:02	0.00127	131	140
6	LYSFRLGLLL	10	HLA-A*24:02	0.00524	3	12	6	SYISYQFNL	9	HLA-A*24:02	0.00145	319	327	6	ALFSLGLDY	9	HLA-A*03:01	0.00303	174	182	6	KYVYEADSFW	10	HLA-A*24:02	0.00186	166	175	6	AATDLTLSY	9	HLA-A*01:01	0.00403	190	198	6	LAANVGFDY	9	HLA-A*01:01	0.00133	160	168
Index	Epitope	Epitope Length	MHC Allele	P value	Matching from	Matching to	Index	Epitope	Epitope Length	MHC Allele	P value	Matching from	Matching to	Index	Epitope	Epitope Length	MHC Allele	P value	Matching from	Matching to	Index	Epitope	Epitope Length	MHC Allele	P value	Matching from	Matching to	Index	Epitope	Epitope Length	MHC Allele	P value	Matching from	Matching to	Index	Epitope	Epitope Length	MHC Allele	P value	Matching from	Matching to
1	KGRVIKNFS	9	HLA-DRB1*03:01	4.53e-05	199	207	1	NSRVRLNFL	9	HLA-DRB1*15:01	0.00204	72	80	1	SAIFLFTTL	9	HLA-DRB1*11:01	0.000925	6	14	1	QWINMKKTL	9	HLA-DRB1*11:01	0.00192	21	29	1	KLQLFASSQ	9	HLA-DRB1*07:01	0.004	241	249	1	TFMVQYYFG	9	HLA-DRB1*15:01	0.000718	108	116
2	KGRVIKNFS	9	HLA-DRB1*15:01	0.00026	199	207	2	RSYISYQFN	9	HLA-DRB1*15:01	0.00392	318	326	2	ELELLLNDD	9	HLA-DRB1*03:01	0.00367	147	155	2	QWINMKKTL	9	HLA-DRB1*07:01	0.00233	21	29	2	EAVMLSMGS	9	HLA-DRB1*03:01	0.00749	155	163	2	PFSHKISTS	9	HLA-DRB1*07:01	0.004	81	89
3	GLLLFCSLL	9	HLA-DRB1*01:01	0.00106	9	17	3	YISYQFNLL	9	HLA-DRB1*01:01	0.00574	320	328	3	IFLFTTLSA	9	HLA-DRB1*07:01	0.00424	8	16	3	KKRQWINMK	9	HLA-DRB1*03:01	0.0025	18	26	3	GKLQLFASS	9	HLA-DRB1*11:01	0.017	240	248	3	DSWFLNASV	9	HLA-DRB1*01:01	0.00539	172	180
4	GNLIIIKHN	9	HLA-DRB1*11:01	0.00116	245	253	4	SYQFNLLDS	9	HLA-DRB1*03:01	0.007	322	330	4	LSAIFLFTT	9	HLA-DRB1*01:01	0.00574	5	13	4	WINMKKTLL	9	HLA-DRB1*01:01	0.00649	22	30	4	EAVMLSMGS	9	HLA-DRB1*15:01	0.0172	155	163	4	INPWVFMIA	9	HLA-DRB1*15:01	0.00643	204	212
5	DTLYFIAYL	9	HLA-DRB1*11:01	0.00237	54	62	5	KLGLNKMNK	9	HLA-DRB1*03:01	0.00801	4	12	5	KNRFGALFS	9	HLA-DRB1*15:01	0.00879	169	177	5	KVEFALKDS	9	HLA-DRB1*03:01	0.00654	98	106	5	AREVTINAK	9	HLA-DRB1*03:01	0.018	205	213	5	GFDYMLNDS	9	HLA-DRB1*03:01	0.00749	165	173
6	KHNEHYLSA	9	HLA-DRB1*07:01	0.00298	251	259	6	KPNFRSYIS	9	HLA-DRB1*07:01	0.00867	314	322	6	FSFEINYSS	9	HLA-DRB1*07:01	0.0101	67	75	6	EYKFASWAR	9	HLA-DRB1*11:01	0.00936	317	325	6	KINSARDDA	9	HLA-DRB1*03:01	0.0214	37	45	6	SWFLNASVW	9	HLA-DRB1*07:01	0.00867	173	181

## Sheet: Sheet4
1		Index	Epitope	antigenecity
	MHCI	1	AYAHNDQLL	-0.2826
	MHCI	2	ATADGTVVY	1.1566
	MHCI	3	LLFCSLLFGC	0.9793
	MHCI	4	ISYNDLAPPY	0.0948
	MHCI	5	TVDQTKTKEY	1.0807
	MHCI	6	LYSFRLGLLL	1.4424
		Index	Epitope
	MHCII	1	KGRVIKNFS	-0.8365
	MHCII	2	KGRVIKNFS	-0.8365
	MHCII	3	GLLLFCSLL	1.5179
	MHCII	4	GNLIIIKHN	0.0973
	MHCII	5	DTLYFIAYL	0.8401
	MHCII	6	KHNEHYLSA	-0.1458
2		Index	Epitope
	MHCI	1	ITDFTDIMSY	-0.3893
	MHCI	2	GYSLSAIYTF	0.2108
	MHCI	3	YSDNGEDGY	1.6821
	MHCI	4	YADQDDQNEY	0.9793
	MHCI	5	YYFKPNFRSY	1.0137
	MHCI	6	SYISYQFNL	1.8449
		Index	Epitope
	MHCII	1	NSRVRLNFL	1.2141
	MHCII	2	RSYISYQFN	1.0071
	MHCII	3	YISYQFNLL	1.5362
	MHCII	4	SYQFNLLDS	0.8254
	MHCII	5	KLGLNKMNK	-0.6548
	MHCII	6	KPNFRSYIS	0.1602
3		Index	Epitope
	MHCI	1	YSSYKLEDQY	1.1361
	MHCI	2	VLSISLNSKY	1.257
	MHCI	3	TTLSANAAPY	0.6233
	MHCI	4	VYSYPIHQQL	0.5485
	MHCI	5	GYKFNDNFSF	1.2109
	MHCI	6	ALFSLGLDY	1.6604
		Index	Epitope
	MHCII	1	SAIFLFTTL	0.2575
	MHCII	2	ELELLLNDD	0.2797
	MHCII	3	IFLFTTLSA	0.3887
	MHCII	4	LSAIFLFTT	-0.2953
	MHCII	5	KNRFGALFS	-0.3299
	MHCII	6	FSFEINYSS	1.5186
4		Index	Epitope
	MHCI	1	KLYAGYEYV	-0.0545
	MHCI	2	YGDGTTLGY	1.8772
	MHCI	3	RTRNSHIKK	1.9183
	MHCI	4	TSDDVYGADY	1.3764
	MHCI	5	TLVYLGVEYK	0.3162
	MHCI	6	KYVYEADSFW	-0.1945
		Index	Epitope
	MHCII	1	QWINMKKTL	-1.3533
	MHCII	2	QWINMKKTL	-1.3533	5
	MHCII	3	KKRQWINMK	-0.0268
	MHCII	4	WINMKKTLL	-0.4766
	MHCII	5	KVEFALKDS	0.8873
	MHCII	6	EYKFASWAR	-0.949
5		Index	Epitope
	MHCI	1	VSAMTAQRY	0.5714
	MHCI	2	KLQLFASSQK	-0.3777
	MHCI	3	KLLNGSFGSK	1.0975
	MHCI	4	LQRMRDLAL	0.4229
	MHCI	5	SMRSDTQAM	0.6141
	MHCI	6	AATDLTLSY	0.9573
		Index	Epitope
	MHCII	1	KLQLFASSQ	-0.2414
	MHCII	2	EAVMLSMGS	0.0143
	MHCII	3	GKLQLFASS	-0.1321
	MHCII	4	EAVMLSMGS	0.0143
	MHCII	5	AREVTINAK	1.0448
	MHCII	6	KINSARDDA	0.3953
6		Index	Epitope
	MHCI	1	YYFGEANSTF	0.1142
	MHCI	2	YMLNDSWFL	0.524
	MHCI	3	DYMLNDSWFL	0.5992
	MHCI	4	FTDNISFEV	1.3654
	MHCI	5	NYTTFFDESF	-0.2818
	MHCI	6	LAANVGFDY	0.834
		Index	Epitope
	MHCII	1	TFMVQYYFG	1.4084
	MHCII	2	PFSHKISTS	1.264
	MHCII	3	DSWFLNASV	0.3026
	MHCII	4	INPWVFMIA	1.2863
	MHCII	5	GFDYMLNDS	0.9477
	MHCII	6	SWFLNASVW	0.3695
									Protein Accession	Protein GI	Gene Symbol	Locus Tag	Gene ID	Protein Note	Localization	Probability	Adhesin Probability	Trans-membrane helices	Antigenacity
								1	NP_230184.1	15640555	VC0533	VC0533	2615202	lipoprotein NlpD	Outer Membrane	0.992	0.654	0	0.7878
								2	NP_230282.1	15640653	VC0633	VC0633	2615421	outer membrane protein OmpU	Outer Membrane	1	0.563	0	0.74
								3	NP_230492.1	15640861	VC0844	VC0844	2614511	accessory colonization factor AcfA	Outer Membrane	0.952	0.550	0	0.7709
								4	NP_231488.1	15641856	VC1854	VC1854	2613608	porin, putative	Outer Membrane	1	0.518	0	0.7463
								5	NP_231773.1	15642141	VC2142	VC2142	2613278	flagellin	Extracellular	1	0.524	0	0.8273
								6	NP_233253.1	15601622	VCA0867	VCA0867	2612873	outer membrane protein W	Outer Membrane	1	0.640	0	0.7774
